# Supplementary material
Source: PubMed Central journal article supplement (PMC5556924)

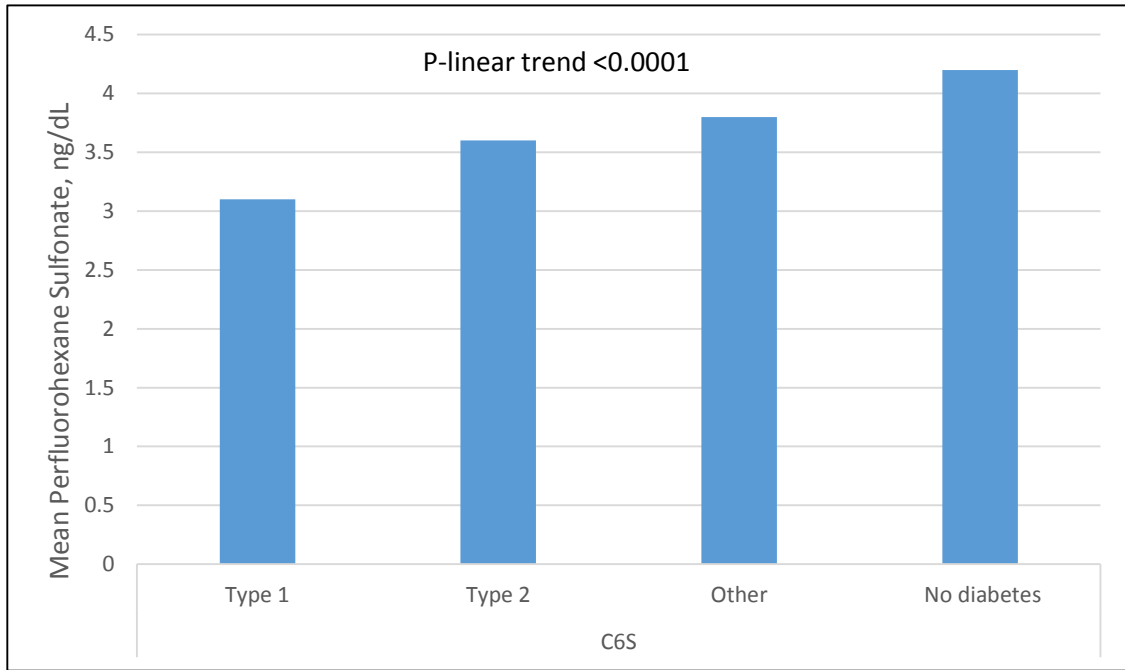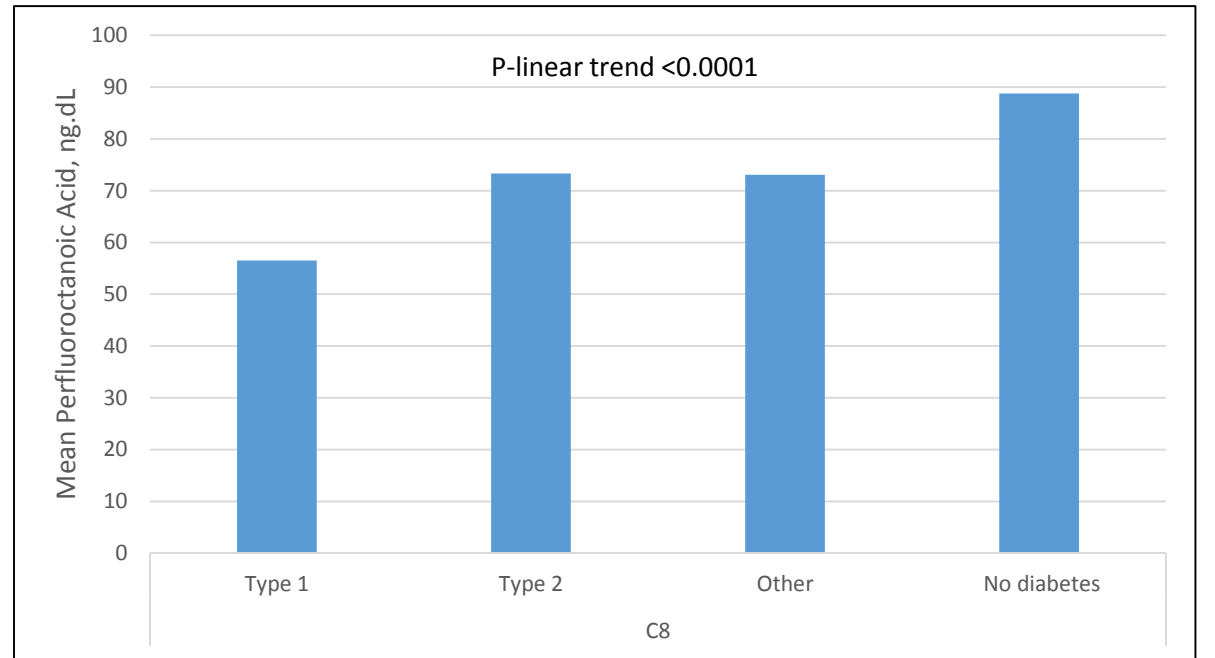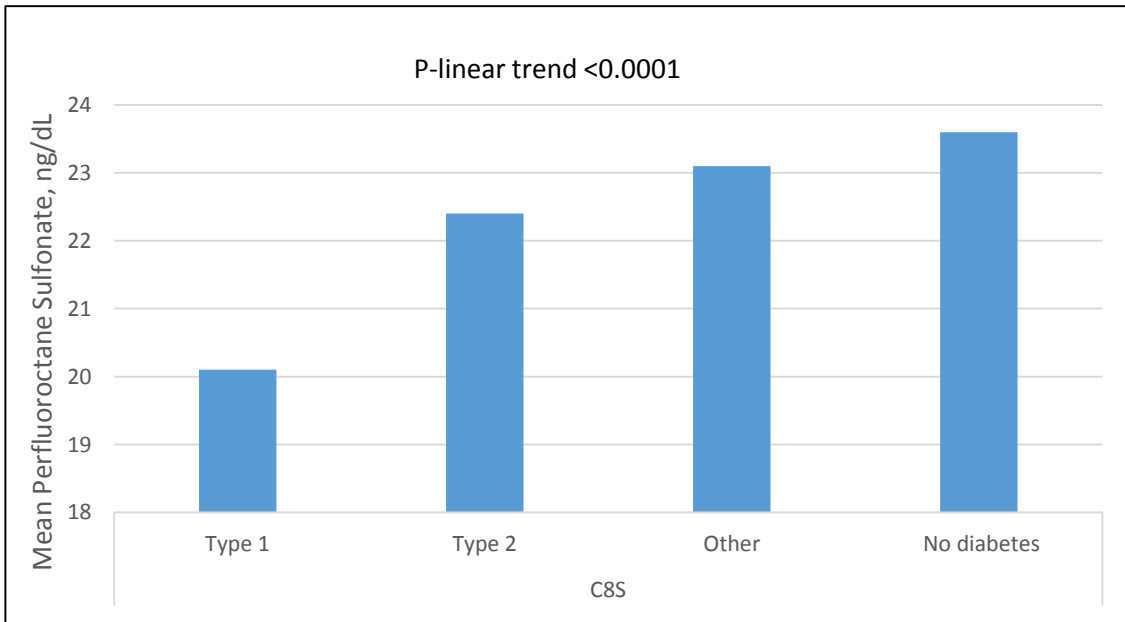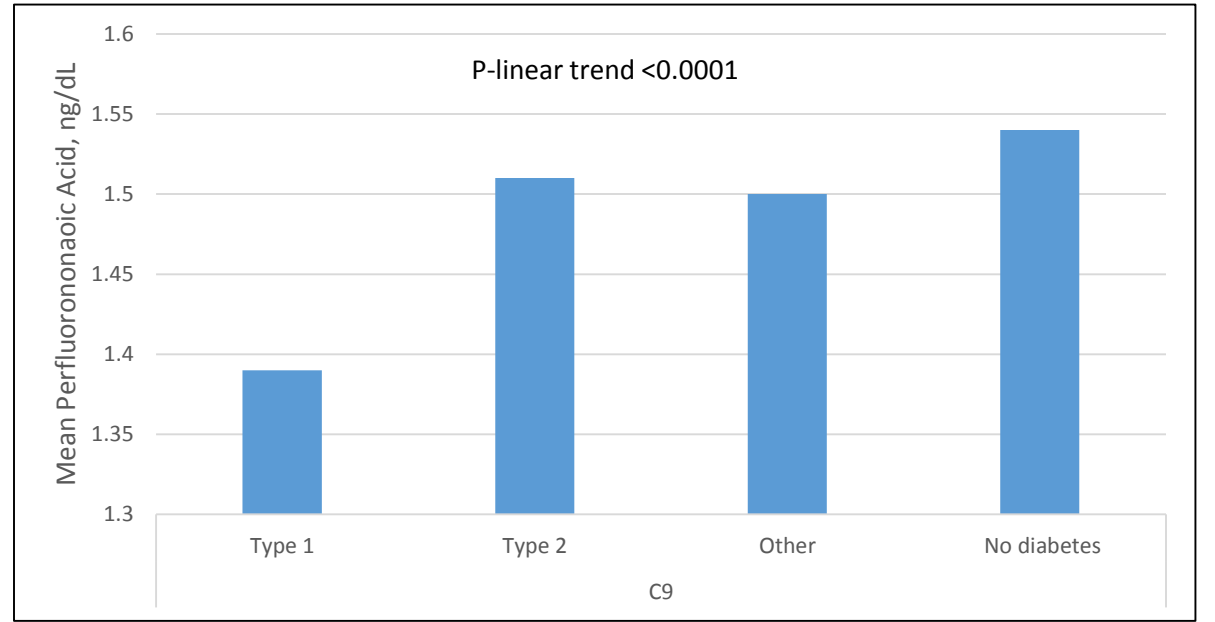

Supplement: NIHMS786901-supplement-2.pdf [file NIHMS786901-supplement-2.pdf]

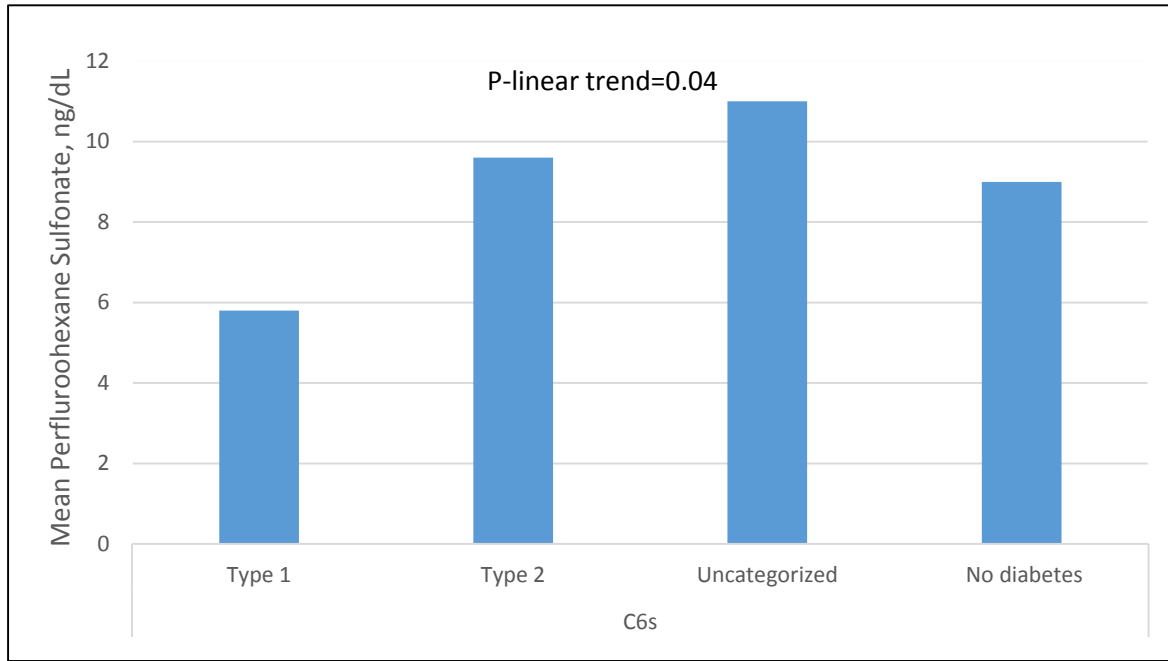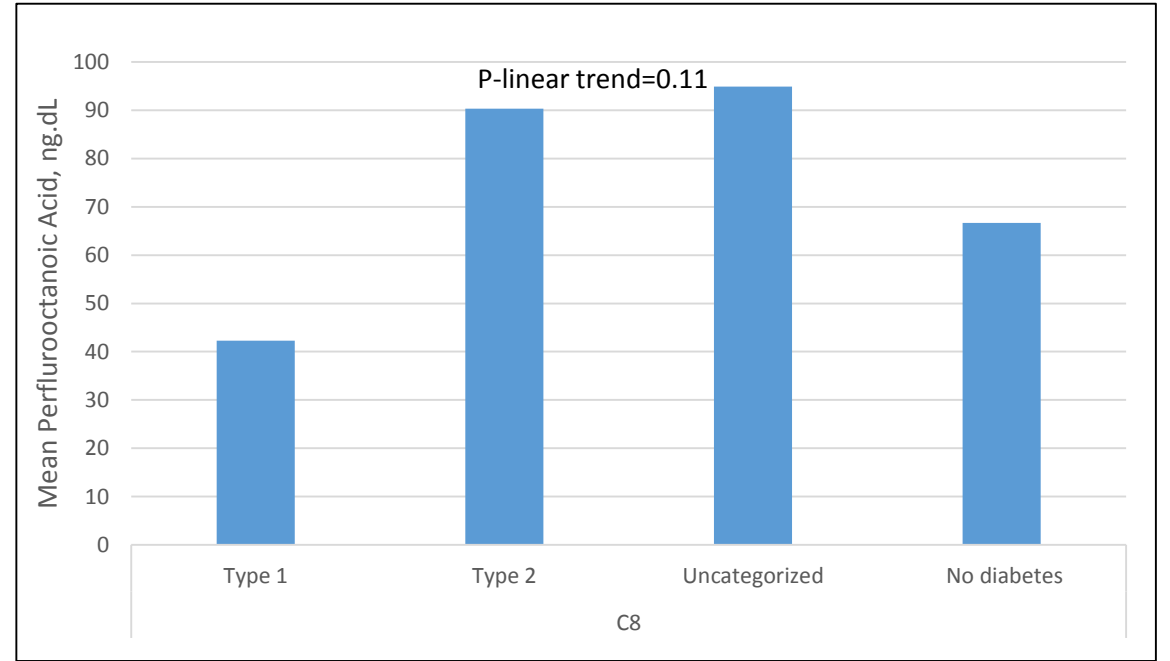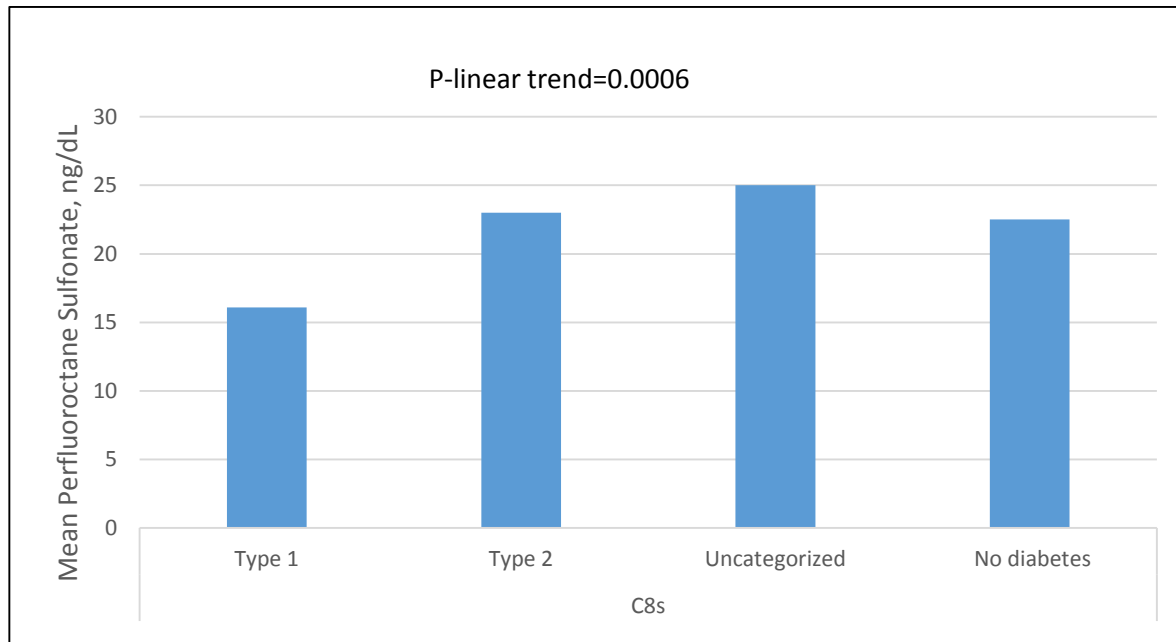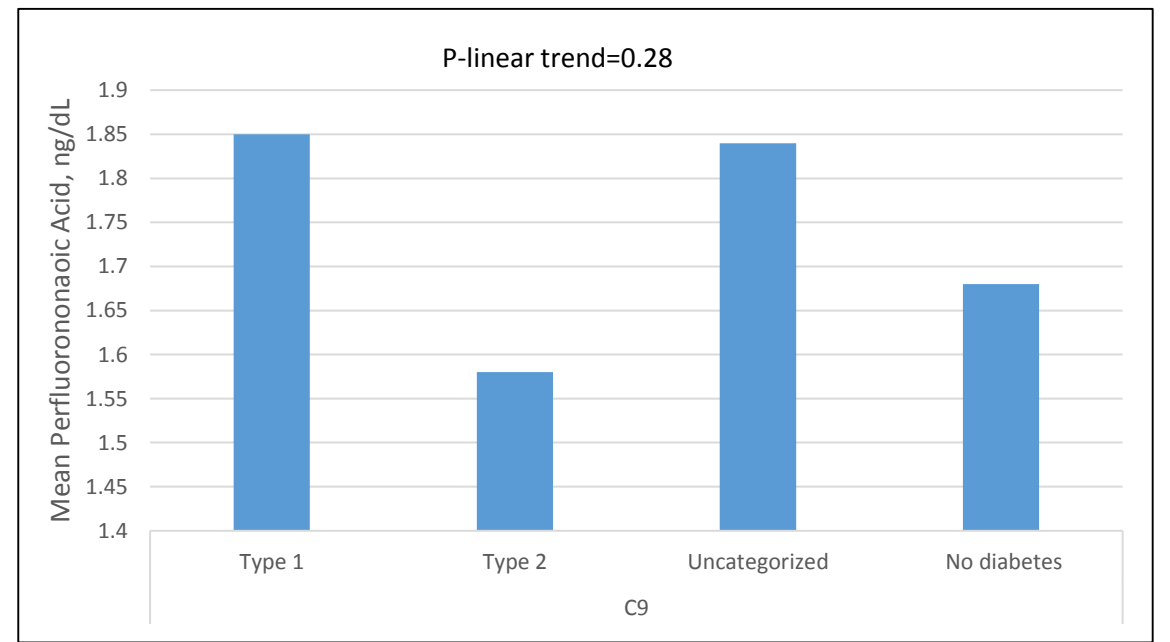

Supplement: NIHMS786901-supplement-3.pdf [file NIHMS786901-supplement-3.pdf]
